# Supplementary material
Source: PubMed Central journal article supplement (PMC4524338)
Supplement: NIHMS712108-supplement-Supplement.pdf [file NIHMS712108-supplement-Supplement.pdf]

## Supplemental Information

A comparative study of ATP analogs for Kinase-catalyzed Photo-crosslinking

*Satish Garre, Chamara Senevirathne, and Mary Kay H. Pflum*

### Table of Contents:

|                                              |     |
|----------------------------------------------|-----|
| I. Characterization of compounds             | S2  |
| II. Quantitative mass spectrometric analysis | S7  |
| III. Auto dock analysis                      | S10 |
| IV. Figures from Docking Studies             | S14 |

### III. Characterization of compounds

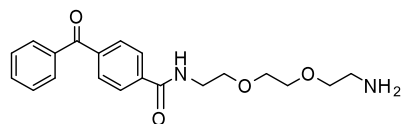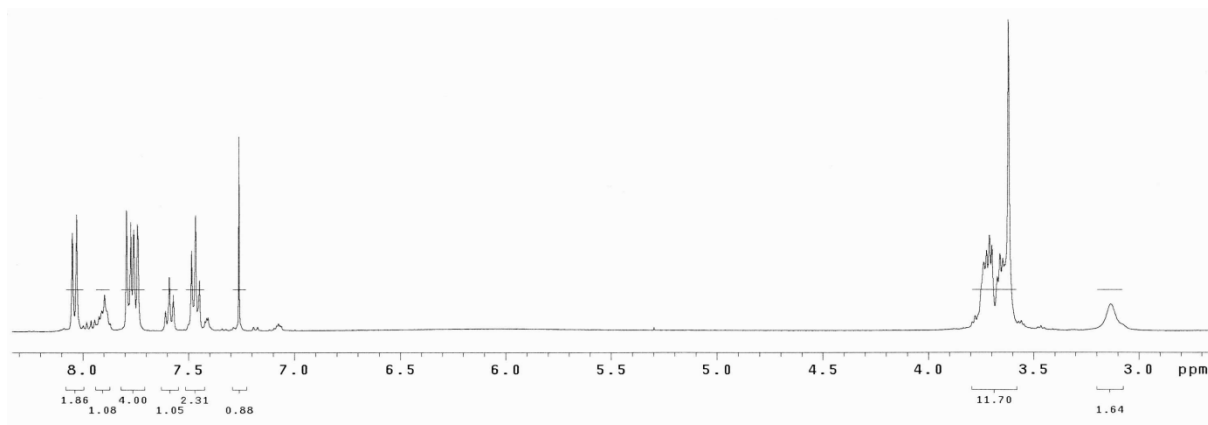

Figure S1: <sup>1</sup>H-NMR of compound **6** recorded in CDCl<sub>3</sub> solvent.

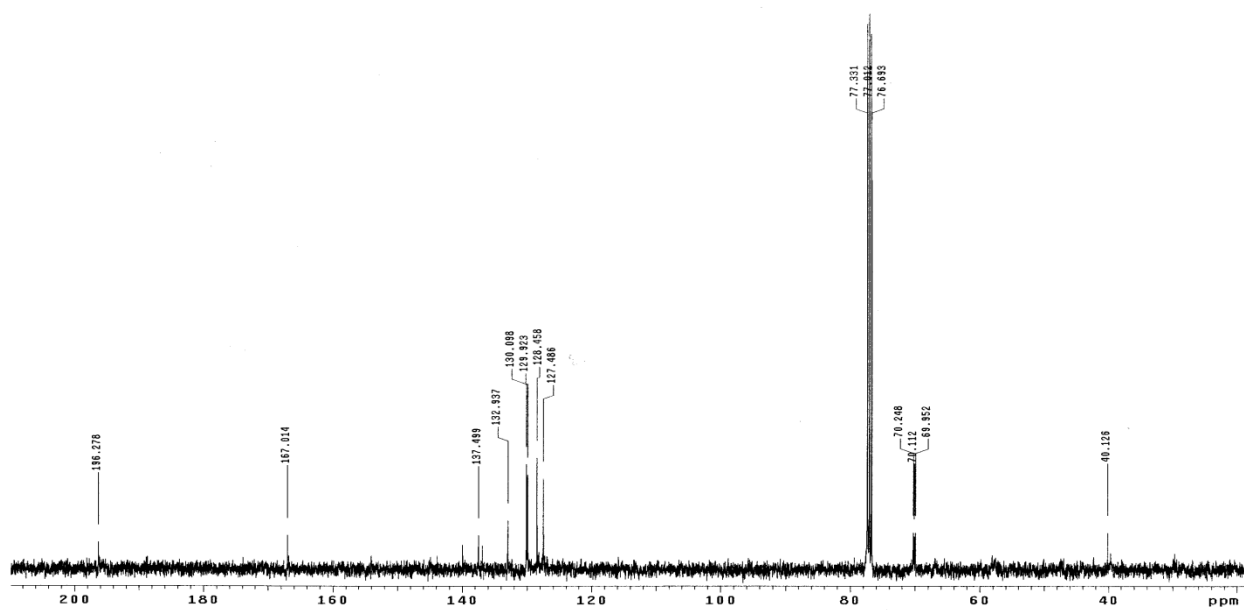

Figure S2: <sup>13</sup>C-NMR of compound **6** recorded in CDCl<sub>3</sub> solvent.

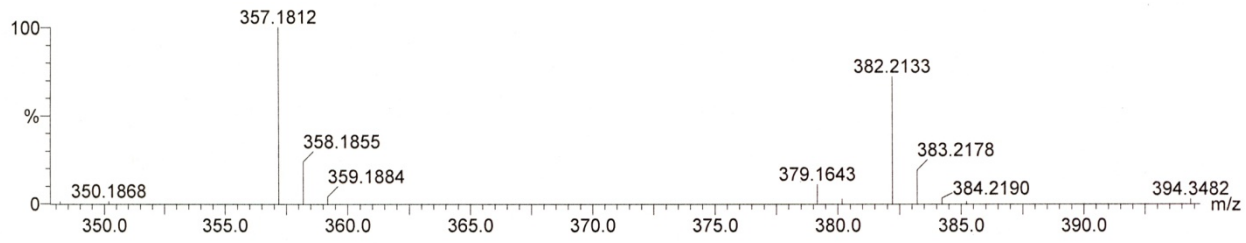

Minimum: -1.5  
 Maximum: 50.0 5.0 150.0

| Mass     | Calc. Mass | mDa  | PPM  | DBE  | i-FIT | i-FIT (Norm) | Formula           |
|----------|------------|------|------|------|-------|--------------|-------------------|
| 357.1812 | 357.1814   | -0.2 | -0.6 | 9.5  | 38.6  | 2.6          | C20 H25 N2 O4     |
|          | 357.1804   | 0.8  | 2.2  | 11.5 | 36.5  | 0.5          | C19 H22 N6 23Na   |
|          | 357.1822   | -1.0 | -2.8 | -1.5 | 39.6  | 3.5          | C7 H26 N8 O7 23Na |
|          | 357.1828   | -1.6 | -4.5 | 14.5 | 37.3  | 1.3          | C21 H21 N6        |

**Figure S3:** HR-MS of compound **6** recorded with methanol solvent.

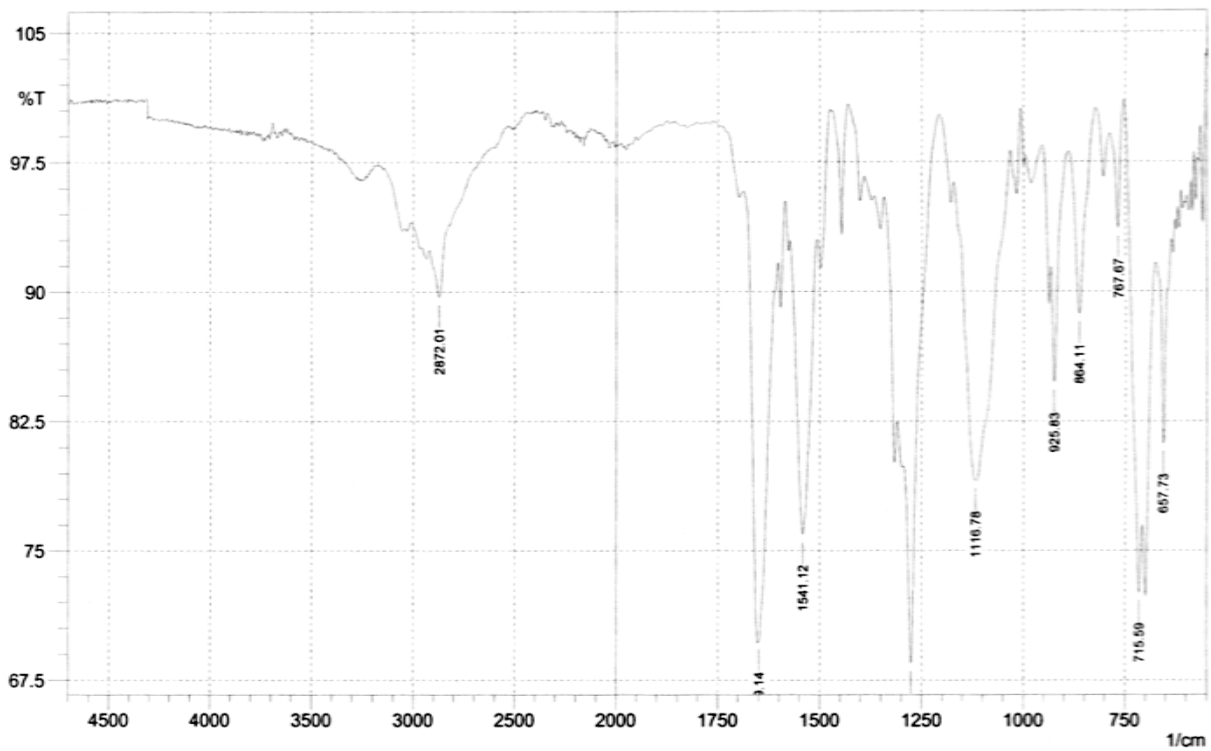

**Figure S4:** IR spectrum of compound **6**.

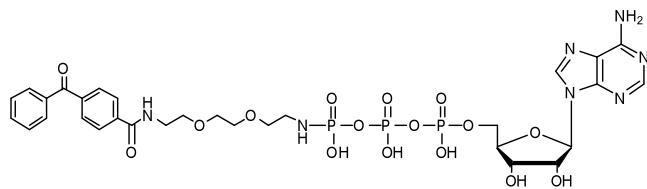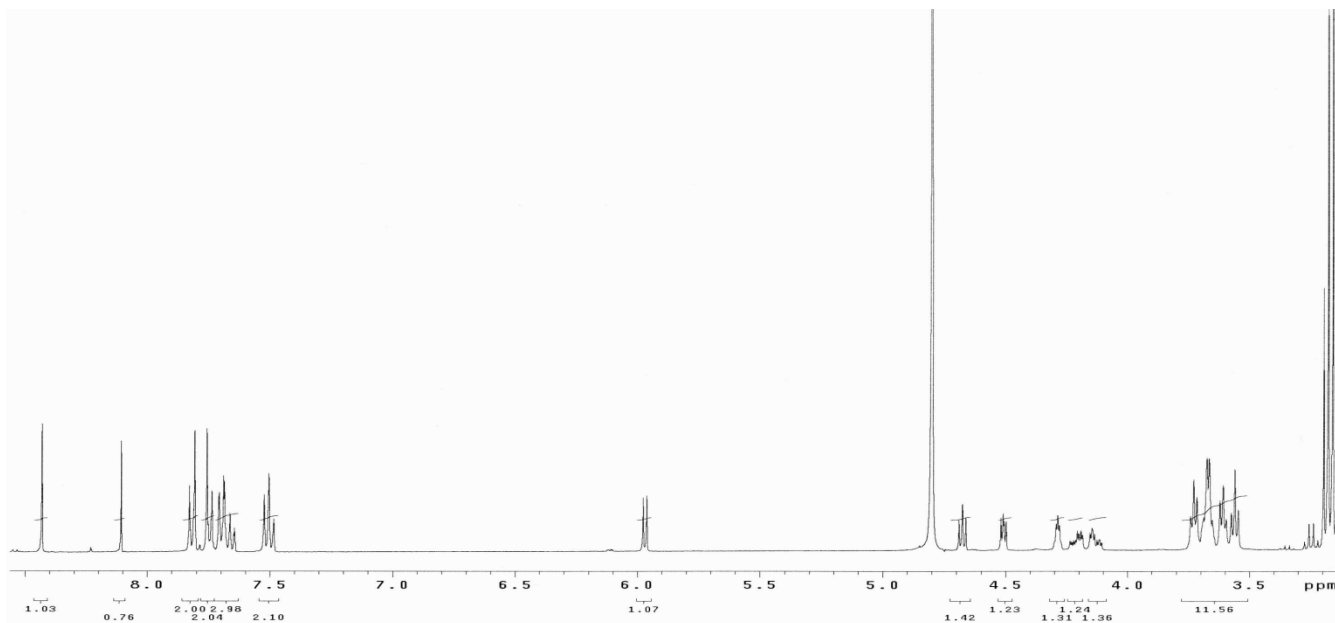

**Figure S5:**  $^1\text{H-NMR}$  of ATP-BP **3** recorded in  $\text{D}_2\text{O}$  solvent.

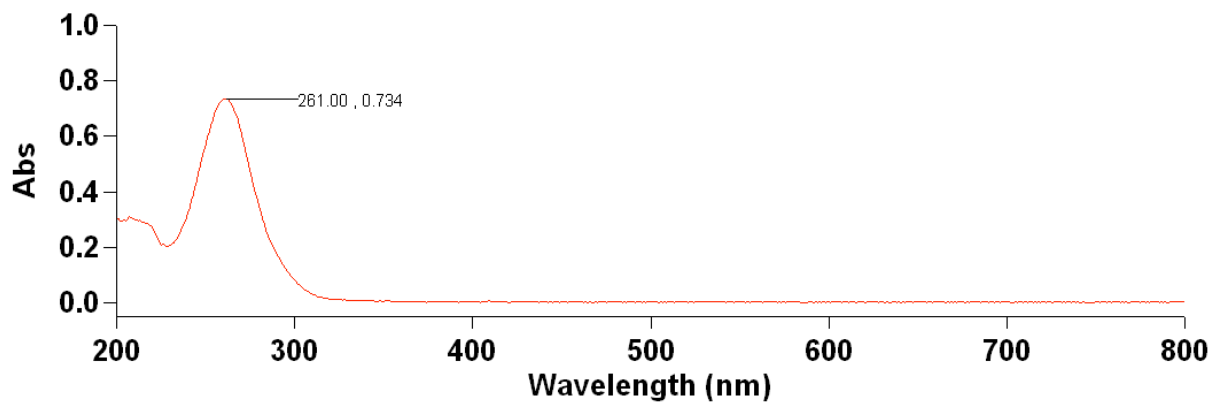

**Figure S6:** UV absorbance of ATP-BP **3**.

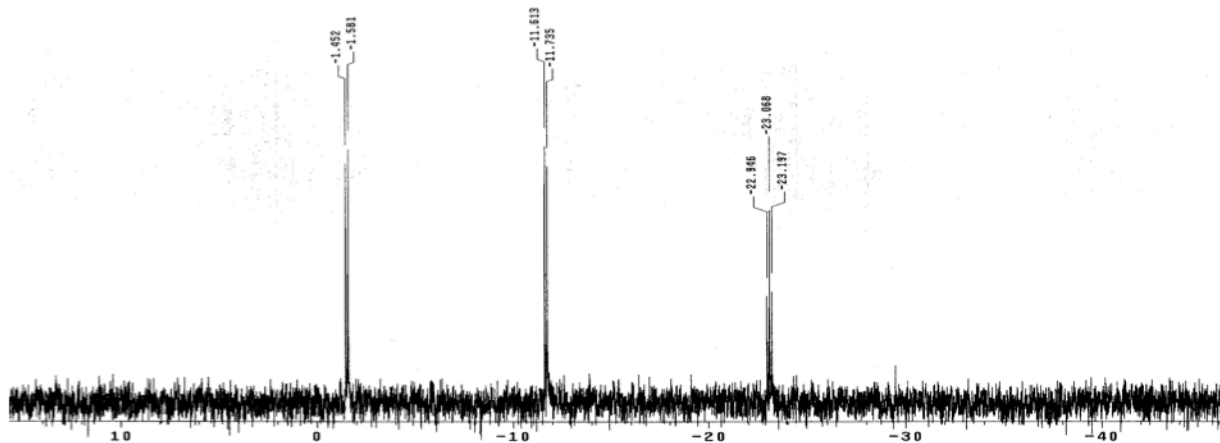

Figure S7:  $^{31}\text{P}$ -NMR of ATP-BP 3 recorded in  $\text{D}_2\text{O}$  solvent.

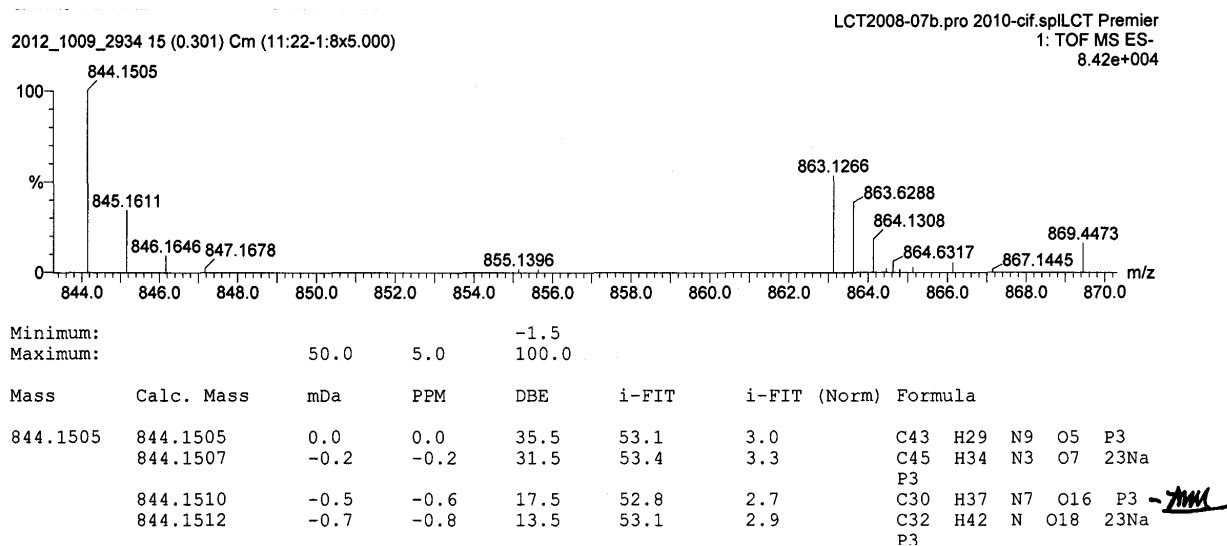

Figure S8: HR-MS of ATP-BP 3 recorded with methanol solvent.

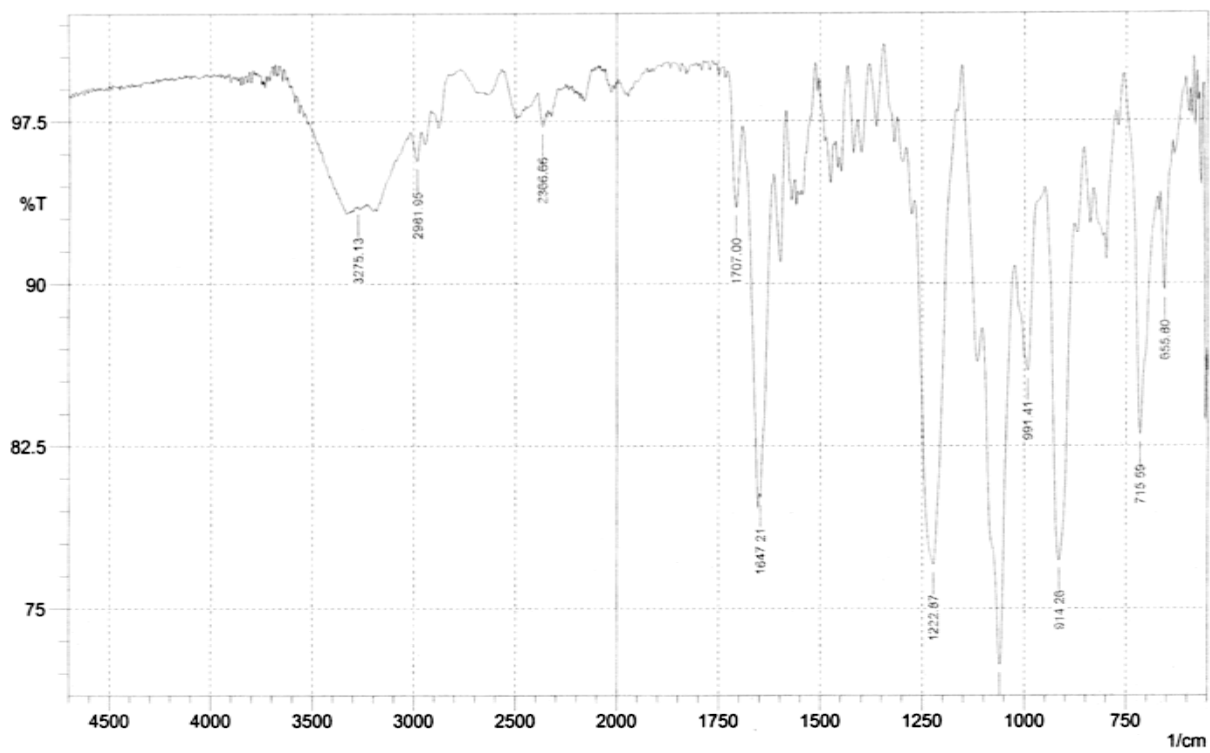

**Figure S9:** IR spectrum of ATP-BP 3.

## II. Quantitative mass spectrometric analysis:

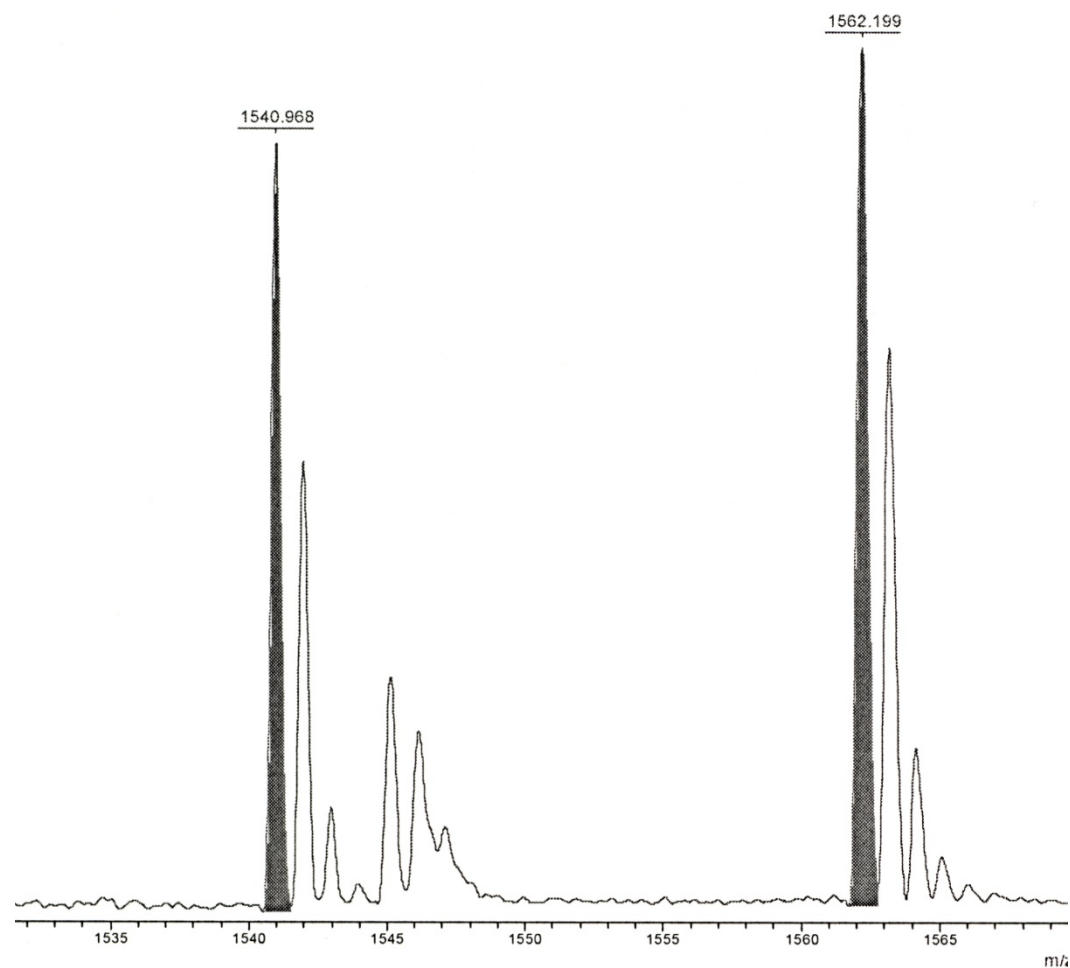

| m/z      | SN    | Res. | Intens. | Area |
|----------|-------|------|---------|------|
| 1540.968 | 115.0 | 4094 | 813.42  | 317  |
| 1562.199 | 129.6 | 3420 | 916.66  | 431  |

**Figure S10:** (Trial 1) Quantitative MALDI-TOF MS of peptide substrate (RRREEETEEE) with CKII kinase and either ATP **1** or ATP-benzophenone **3**. The peak at m/z ~1541 corresponds to heptamethylated phosphopeptide after reaction with ATP-benzophenone and acidic cleavage of phosphoramidate bond, while the peak at m/z ~1562 corresponds to the deuterated heptamethylated phosphopeptide after phosphorylation with ATP. Percent conversion of this single trial was 74%.

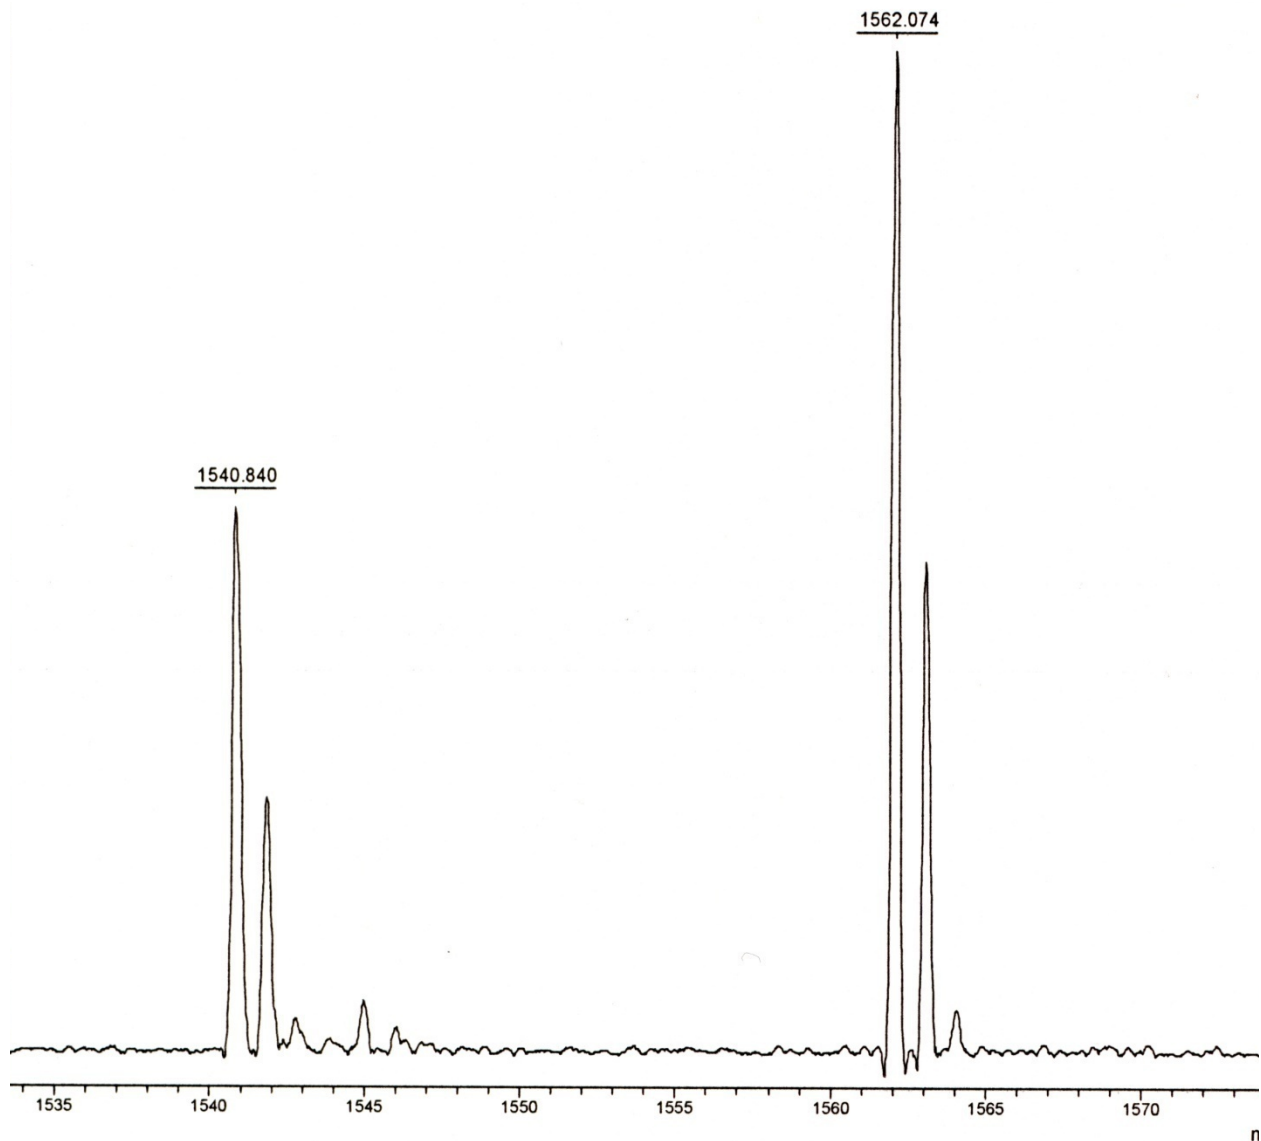

| m/z      | SN   | Res. | Intens. | Area |
|----------|------|------|---------|------|
| 1540.840 | 21.2 | 5016 | 55.36   | 18   |
| 1562.074 | 39.0 | 5803 | 101.99  | 28   |

**Figure S11:** (Trial 2) Quantitative MALDI-TOF MS of peptide substrate (RRREEETEEE) with CKII kinase and either ATP **1** or ATP-benzophenone **3**. Percent conversion of this trial is 65%. See Figure S1 for more details.



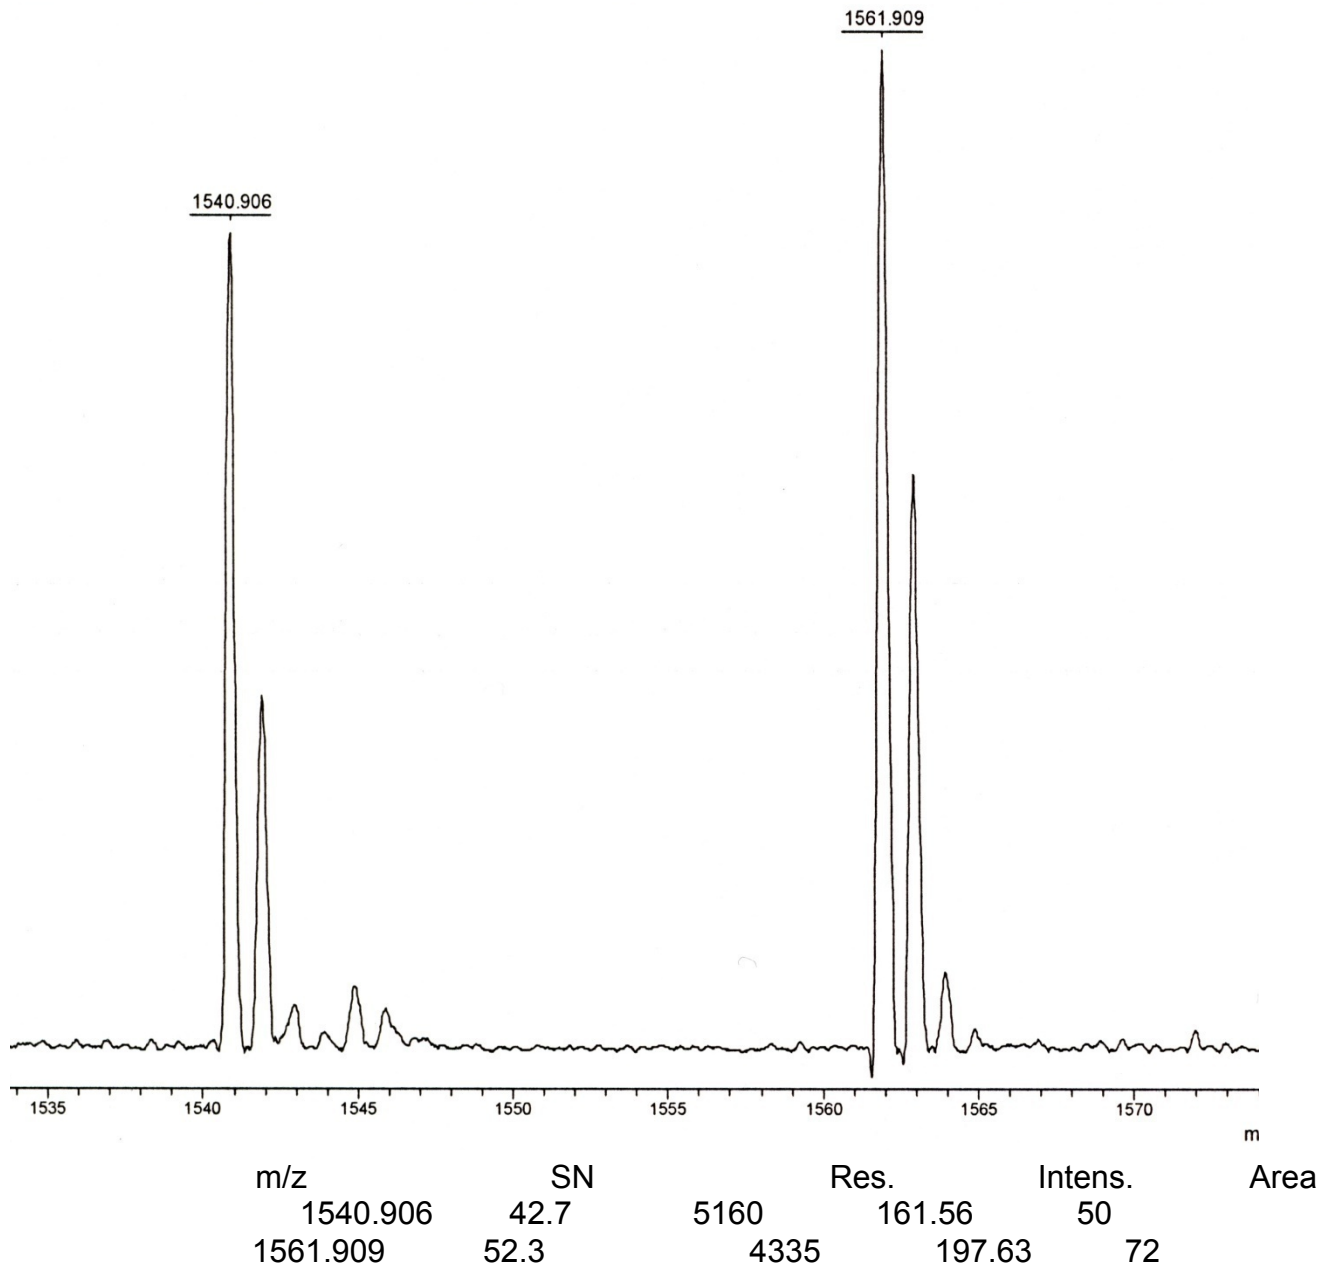

**Figure S12:** (Trial 3) Quantitative MALDI-TOF MS of peptide substrate (RRREEETEEE) with CKII kinase and either ATP **1** or ATP-benzophenone **3**. Percent conversion of this single trial is 74%. See Figure S1 for more details.

### III. Autodock analysis:

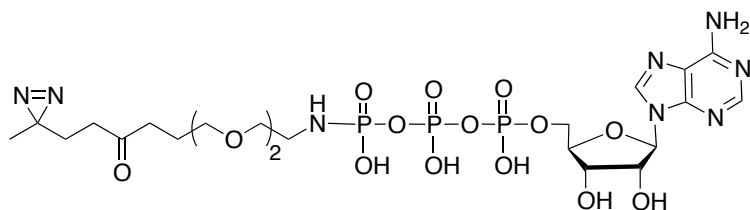

**Figure S13.** Structure of an ATP-diazirine (ATP-DAz) analog used in the docking studies in Figure 4 and 5 of the manuscript. This structure maintains the same polyethylene glycol linker as both the ATP-ArN<sub>3</sub> and ATP-BP analogs, but positions a dialkyl diazirine at the terminus.

#### A) CK2 kinase docking

The lowest energy binding mode that conforms to the kinase-catalyzed phosphorylation mechanism is in bold for each docking experiment. The grid box dimensions used in all the analysis was the same or similar.

**Table S1.** The grid dimensions and output file with all the different binding modes obtained from docking of ATP-ArN<sub>3</sub> (**2**).

center\_x = 21.579    size\_x = 22  
center\_y = 5.811    size\_y = 30  
center\_z = 19.517    size\_z = 18                    exhaustiveness = 8.

mode | affinity | dist from best mode  
     | (kcal/mol) | rmsd l.b. | rmsd u.b.

| mode     | affinity<br>(kcal/mol) | dist from best mode<br>rmsd l.b. | dist from best mode<br>rmsd u.b. |
|----------|------------------------|----------------------------------|----------------------------------|
| <b>1</b> | <b>-8.1</b>            | <b>0.000</b>                     | <b>0.000</b>                     |
| 2        | -7.2                   | 3.685                            | 5.354                            |
| 3        | -7.2                   | 8.785                            | 10.991                           |
| 4        | -7.1                   | 3.032                            | 5.129                            |
| 5        | -7.1                   | 4.889                            | 7.208                            |
| 6        | -6.9                   | 2.469                            | 3.659                            |
| 7        | -6.9                   | 3.559                            | 5.621                            |
| 8        | -6.8                   | 5.732                            | 8.818                            |
| 9        | -6.7                   | 10.940                           | 13.509                           |

**Table S2.** The grid dimensions and output file with all the different binding modes obtained from docking of ATP-BP (**3**).

center\_x = 21.579    size\_x = 22  
center\_y = 5.811    size\_y = 30  
center\_z = 19.517    size\_z = 18            exhaustiveness = 8

mode | affinity | dist from best mode  
     | (kcal/mol) | rmsd l.b. | rmsd u.b.

| mode     | affinity (kcal/mol) | dist from best mode rmsd l.b. | dist from best mode rmsd u.b. |
|----------|---------------------|-------------------------------|-------------------------------|
| <b>1</b> | <b>-7.3</b>         | <b>0.000</b>                  | <b>0.000</b>                  |
| 2        | -7.3                | 4.706                         | 11.056                        |
| 3        | -6.7                | 1.462                         | 2.275                         |
| 4        | -5.3                | 3.205                         | 8.800                         |
| 5        | -5.2                | 4.051                         | 8.731                         |
| 6        | -5.1                | 4.015                         | 8.548                         |
| 7        | -5.0                | 4.001                         | 8.547                         |
| 8        | -4.9                | 3.656                         | 4.845                         |
| 9        | -4.8                | 3.301                         | 9.279                         |

**Table S3.** The grid dimensions and output file with all the different binding modes obtained from docking of an ATP-DAz analog, with the structure shown below (Figure S13).

center\_x = 21.579    size\_x = 22  
center\_y = 5.811    size\_y = 30  
center\_z = 19.517    size\_z = 18            exhaustiveness = 8

mode | affinity | dist from best mode  
     | (kcal/mol) | rmsd l.b. | rmsd u.b.

| mode     | affinity (kcal/mol) | dist from best mode rmsd l.b. | dist from best mode rmsd u.b. |
|----------|---------------------|-------------------------------|-------------------------------|
| 1        | -6.5                | 0.000                         | 0.000                         |
| <b>2</b> | <b>-6.5</b>         | <b>3.228</b>                  | <b>11.654</b>                 |
| 3        | -6.1                | 2.106                         | 3.128                         |
| 4        | -5.8                | 4.891                         | 12.286                        |
| 5        | -5.8                | 2.521                         | 4.035                         |
| 6        | -5.7                | 3.274                         | 11.896                        |
| 7        | -5.5                | 1.740                         | 2.940                         |
| 8        | -5.4                | 2.944                         | 5.893                         |
| 9        | -5.3                | 1.727                         | 2.881                         |

## B) PKA kinase docking

The lowest energy binding mode that conforms to the kinase-catalyzed phosphorylation mechanism is in bold for each docking experiment. The grid box dimensions used in all the analysis was the same or similar.

**Table S4.** The grid dimensions and output file with all the different binding modes obtained from docking of ATP-ArN<sub>3</sub> (**2**).

center\_x = 12.723    size\_x = 28  
center\_y = 8.552    size\_y = 20  
center\_z = 2.82     size\_z = 16            exhaustiveness = 8

mode | affinity | dist from best mode  
| (kcal/mol) | rmsd l.b. | rmsd u.b.

| mode     | affinity (kcal/mol) | dist from best mode rmsd l.b. | dist from best mode rmsd u.b. |
|----------|---------------------|-------------------------------|-------------------------------|
| 1        | -7.6                | 0.000                         | 0.000                         |
| 2        | -7.6                | 2.552                         | 4.617                         |
| <b>3</b> | <b>-7.2</b>         | <b>3.196</b>                  | <b>15.716</b>                 |
| 4        | -7.2                | 2.061                         | 3.817                         |
| 5        | -7.2                | 2.418                         | 4.028                         |
| 6        | -7.2                | 2.202                         | 14.849                        |
| 7        | -7.1                | 3.220                         | 5.859                         |
| 8        | -7.0                | 2.486                         | 4.993                         |
| 9        | -7.0                | 2.848                         | 5.832                         |

**Table S5.** The grid dimensions and output file with all the different binding modes obtained from docking of ATP-BP (**3**).

center\_x = 12.886    size\_x = 28  
center\_y = 8.549    size\_y = 20  
center\_z = 2.924    size\_z = 18            exhaustiveness = 8

mode | affinity | dist from best mode  
| (kcal/mol) | rmsd l.b. | rmsd u.b.

| mode     | affinity (kcal/mol) | dist from best mode rmsd l.b. | dist from best mode rmsd u.b. |
|----------|---------------------|-------------------------------|-------------------------------|
| 1        | -10.2               | 0.000                         | 0.000                         |
| 2        | -10.0               | 1.646                         | 2.884                         |
| <b>3</b> | <b>-9.7</b>         | <b>4.611</b>                  | <b>13.432</b>                 |
| 4        | -9.6                | 3.385                         | 14.637                        |
| 5        | -9.6                | 4.480                         | 14.024                        |
| 6        | -9.6                | 3.417                         | 5.212                         |
| 7        | -9.6                | 3.992                         | 6.090                         |
| 8        | -9.4                | 1.918                         | 3.723                         |
| 9        | -9.2                | 2.214                         | 4.154                         |

**Table S6.** The grid dimensions and output file with all the different binding modes obtained from docking of ATP-DAz (Figure S13).

center\_x = 12.723      size\_x = 28  
center\_y = 8.552      size\_y = 20  
center\_z = 2.82        size\_z = 16            exhaustiveness = 8

mode | affinity | dist from best mode  
| (kcal/mol) | rmsd l.b. | rmsd u.b.

| mode     | affinity (kcal/mol) | dist from best mode rmsd l.b. | dist from best mode rmsd u.b. |
|----------|---------------------|-------------------------------|-------------------------------|
| 1        | -7.5                | 0.000                         | 0.000                         |
| 2        | -7.3                | 1.233                         | 2.256                         |
| <b>3</b> | <b>-7.2</b>         | <b>2.663</b>                  | <b>14.449</b>                 |
| 4        | -7.2                | 1.440                         | 2.310                         |
| 5        | -7.1                | 2.304                         | 14.531                        |
| 6        | -6.9                | 2.774                         | 4.834                         |
| 7        | -6.8                | 4.594                         | 6.423                         |
| 8        | -6.8                | 2.376                         | 14.876                        |
| 9        | -6.8                | 2.321                         | 3.800                         |

#### IV. Figures from Docking Studies

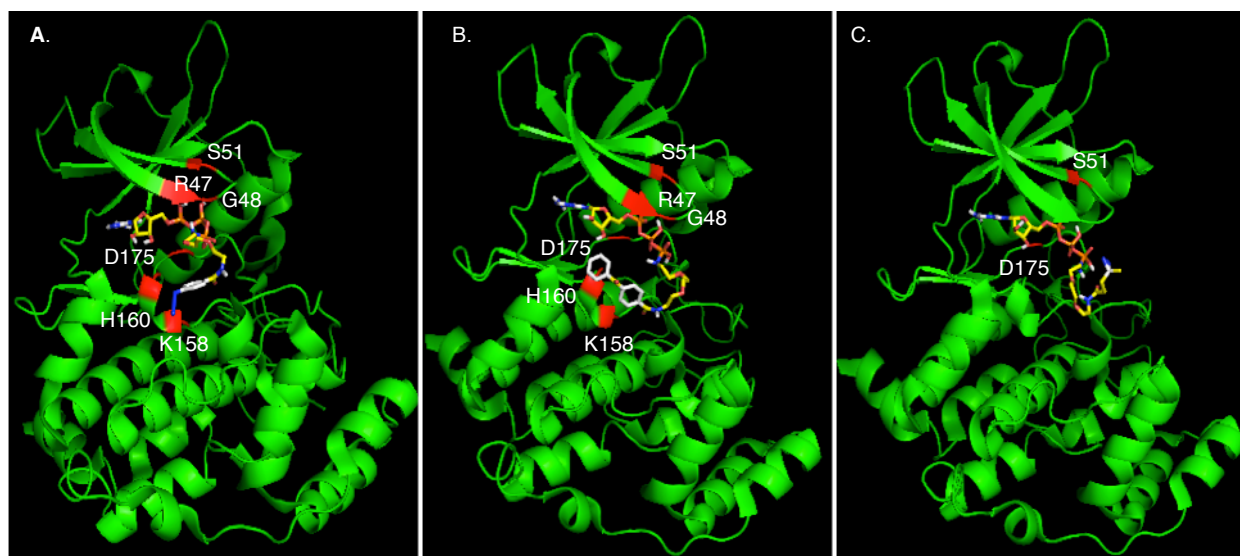

**Figure S14.** Docking of ATP-ArN<sub>3</sub> (A), ATP-BP (B), and ATP-DAz (C) (ball and stick structures) into the full CK2 kinase structure (green, pdb:1DAW). These structures are the full kinase images related to Figure 4 in the manuscript.

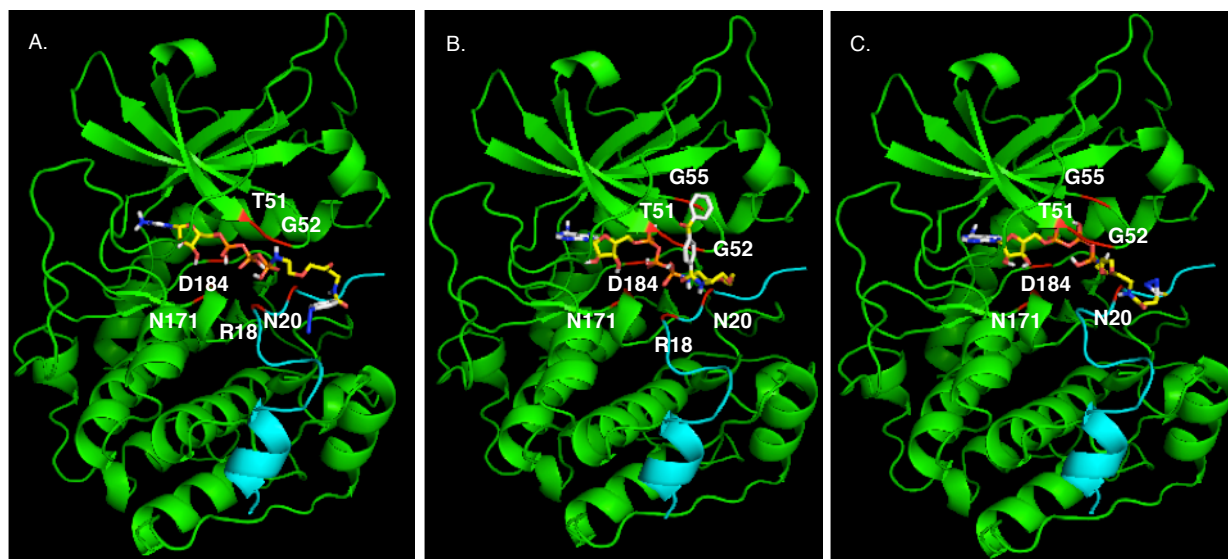

**Figure S15.** Docking of ATP-ArN<sub>3</sub> (A), ATP-BP (B), and ATP-DAz (C) (ball and stick structures) into the full PKA kinase structure (green) in complex with peptide substrate inhibitor (cyan). These structures are the full kinase images related to Figure 5 in the manuscript.

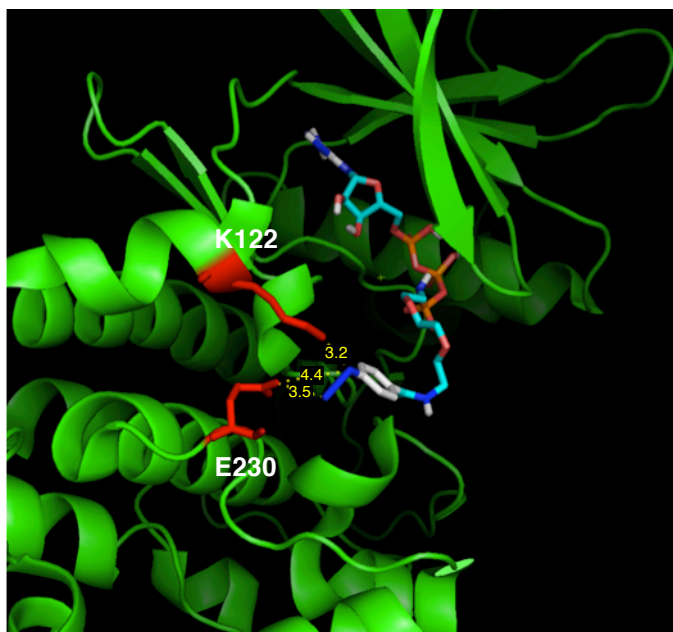

**Figure S16:** Distance measurements of amino acid residues of CK2 kinase residing near the arylazide group of ATP-ArN<sub>3</sub>. The distances shown are from the azide nitrogen to the nearest atoms of K122 and E230. Images were created using Pymol after docking using Autodock.

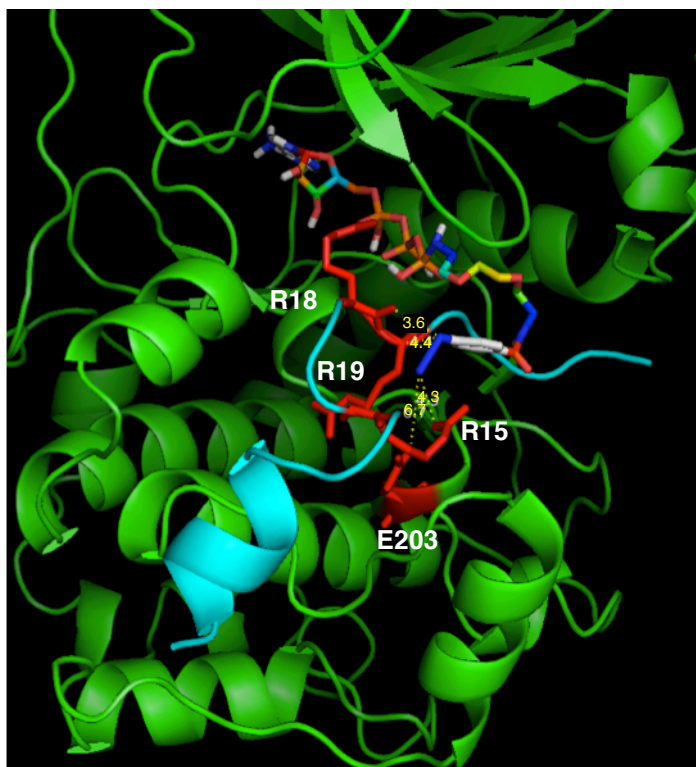

**Figure S17:** Distance measurements of amino acid residues of PKA kinase complex residing near the arylazide group of ATP-ArN<sub>3</sub>. The distances shown are from the azide nitrogen to the nearest atoms of R15, R18, R19, and E203. Images were created using Pymol after docking using Autodock.

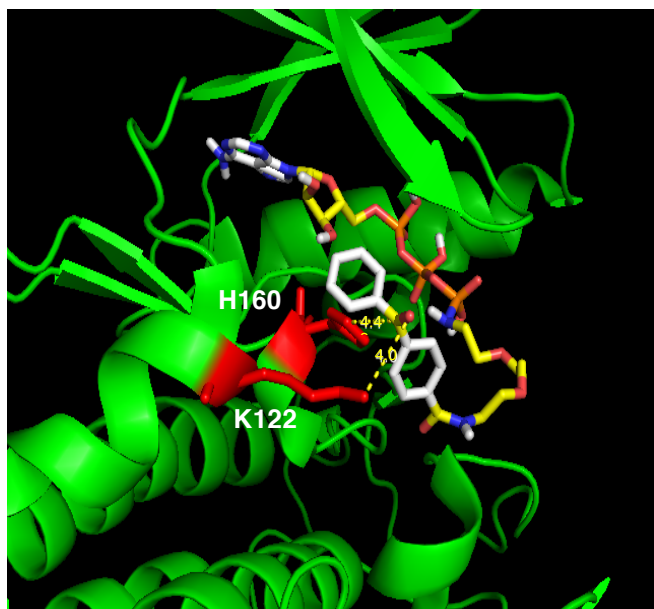

**Figure S18:** Distance measurements from amino acid residues of CK2 kinase to the benzophenone group of ATP-BP. Distances shown are from the benzophenone carbonyl to the nearest atoms of K122 and H160. Images were created using Pymol after docking using Autodock.

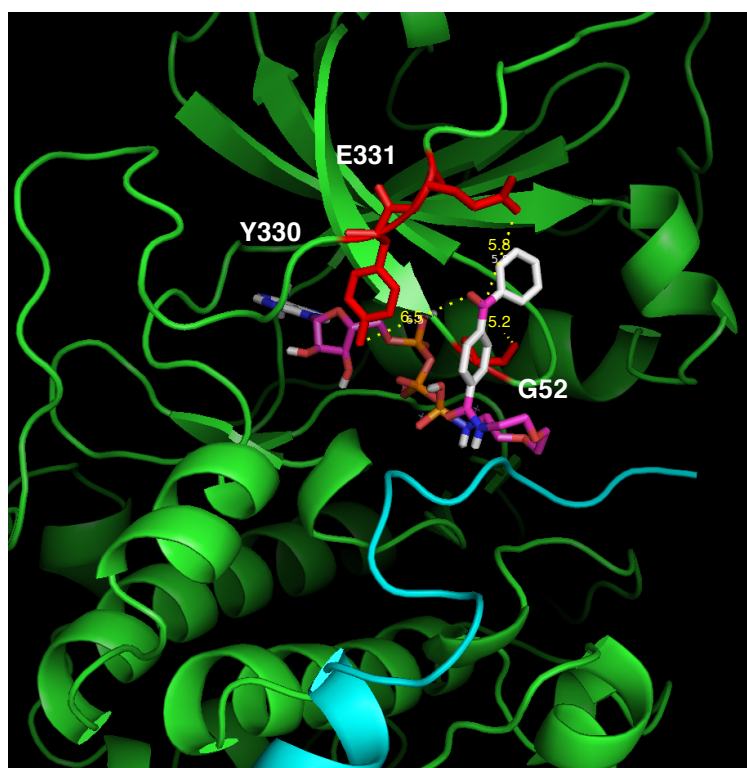

**Figure S19:** Distance measurements from amino acid residues of PKA kinase to the benzophenone group of ATP-BP. The distances shown are from the benzophenone carbonyl to the nearest atom of G52, Y330, and E331. Images were created using Pymol after docking using Autodock.
